# Supplementary material for: MDSCs are induced after experimental blunt chest trauma and subsequently alter antigen-specific T cell responses
Source: PubMed Central journal article supplement (PMC5634472; doi:10.1038/s41598-017-13019-6), 2017-10-09
Supplement: 41598_2017_13019_MOESM1_ESM.pdf [file 41598_2017_13019_MOESM1_ESM.pdf]

## MDSCs are induced after experimental blunt chest trauma and subsequently alter antigen-specific T cell responses

Yvonne Hüsecken<sup>1</sup>, Sylvia Muche<sup>1</sup>, Monika Kustermann<sup>1</sup>, Malena Klingspor<sup>1</sup>, Annette Palmer<sup>2</sup>, Sonja Braumüller<sup>2</sup>, Markus Huber-Lang<sup>2</sup>, Klaus-Michael Debatin<sup>1</sup> and Gudrun Strauss<sup>1\*</sup>

1 Department of Pediatric and Adolescent Medicine, University Medical Center Ulm, Germany

2 Institute of clinical and Experimental Trauma Immunology, University Medical Center Ulm, Germany

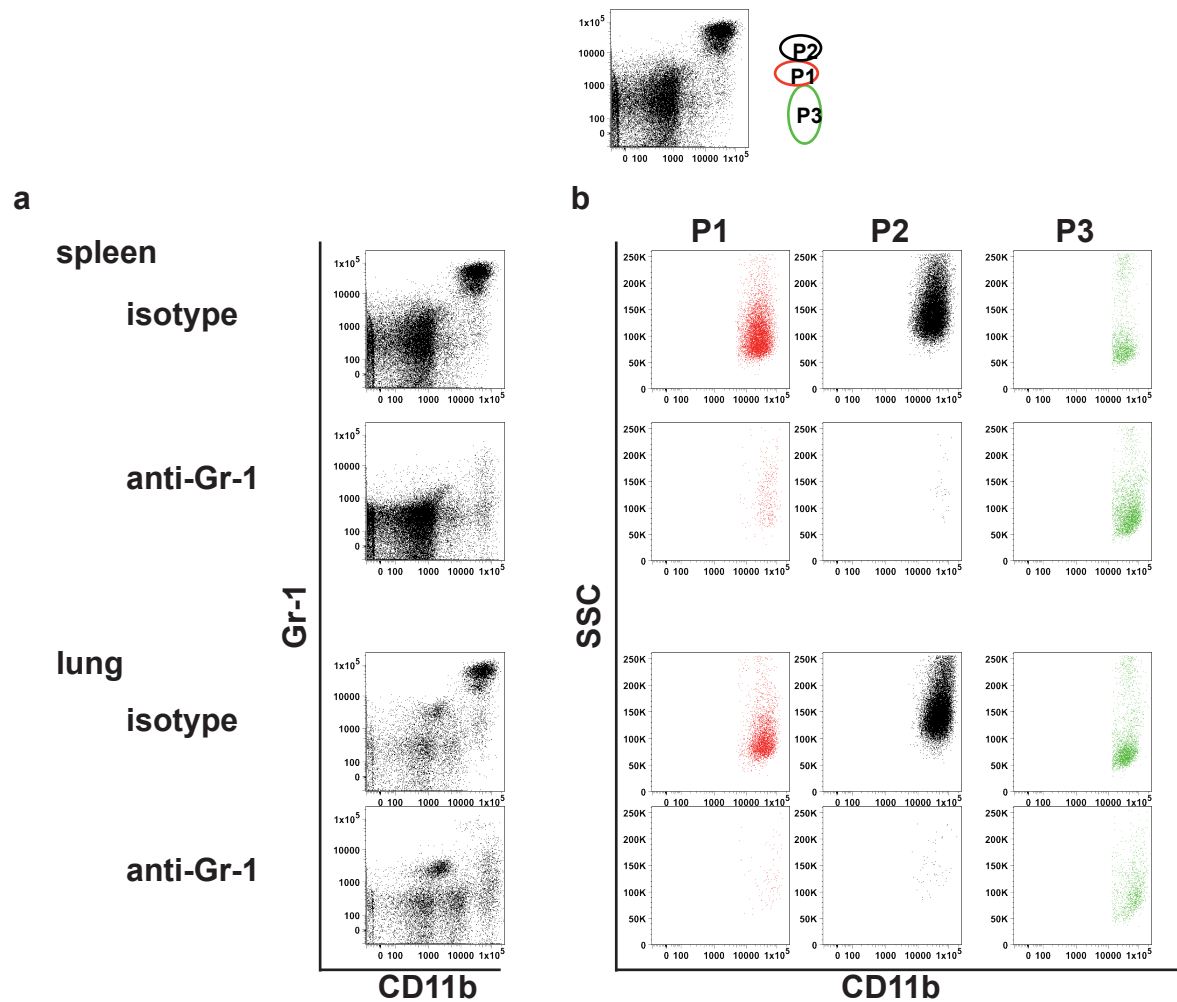

### Supplementary Figure S1: Anti-Gr-1 treatment efficiently depletes Gr-1<sup>high</sup>CD11b<sup>+</sup> cells

Mice were injected either with anti-Gr-1 antibody or isotype control 24 hours before TxT. a) 24 hours after TxT, spleen and lung cells were stained with anti-Gr-1 and CD11b antibodies. b) To further prove  $\alpha$ -Gr-1-mediated cell depletion, Gr-1 positive cells were gated (P1, P2, P3) on cells of the isotype-treated animals and gates were copied on cells of anti-Gr-1 treated animals. Cells in P1, P2 and P3 were depicted as CD11b/SSC flow diagrams.

## MDSCs are induced after experimental blunt chest trauma and subsequently alter antigen-specific T cell responses

Yvonne Hüsecken<sup>1</sup>, Sylvia Muche<sup>1</sup>, Monika Kustermann<sup>1</sup>, Malena Klingspor<sup>1</sup>, Annette Palmer<sup>2</sup>, Sonja Braumüller<sup>2</sup>, Markus Huber-Lang<sup>2</sup>, Klaus-Michael Debatin<sup>1</sup> and Gudrun Strauss<sup>1\*</sup>

1 Department of Pediatric and Adolescent Medicine, University Medical Center Ulm, Germany

2 Institute of clinical and Experimental Trauma Immunology, University Medical Center Ulm, Germany

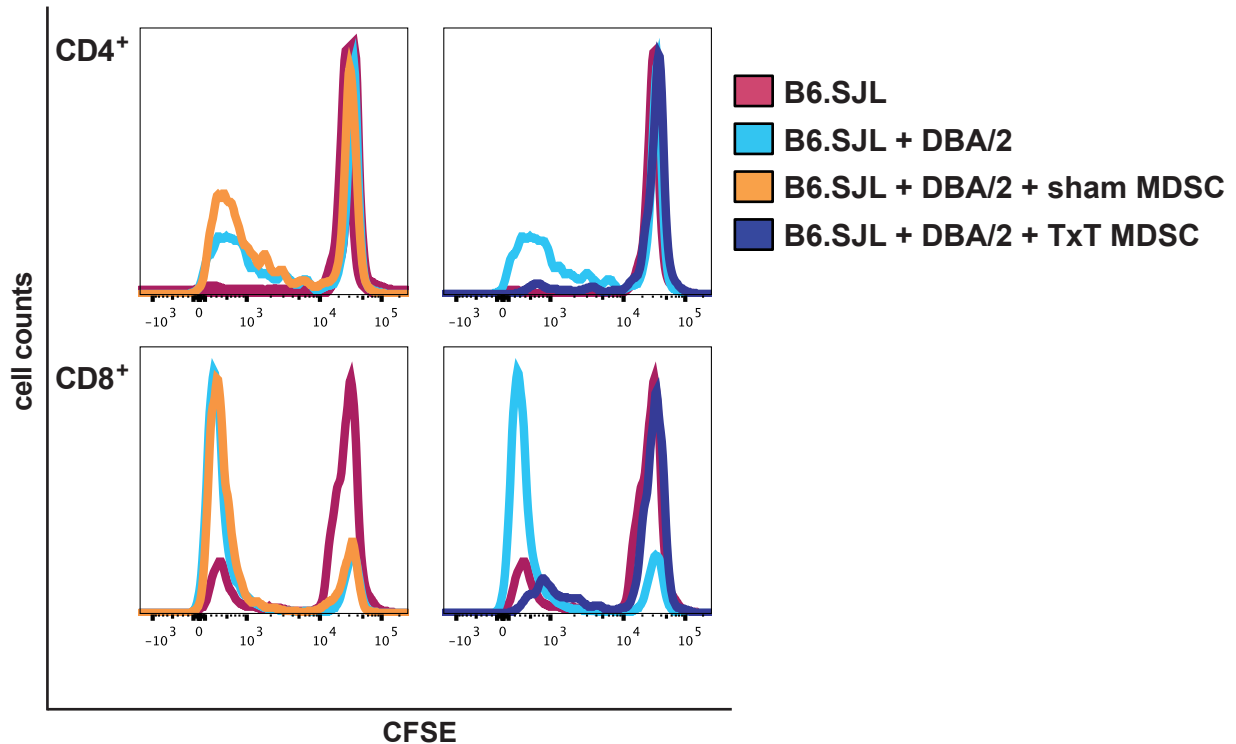

### Supplementary Figure S2: Representative flow data for MDSC-mediated inhibition of alloantigen-specific T cell proliferation

MDSCs were isolated by magnetic beads from spleens at 24 hours from sham- or TxT-treated mice and co-cultivated with CFSE-labeled spleen cells of B6.SJL mice (H-2<sup>b</sup>, CD45.1<sup>+</sup>), which were activated alloantigen-specifically with irradiated spleen cells of DBA/2 mice (H-2<sup>d</sup>, CD45.2<sup>+</sup>). MDSCs were added with a MDSC:T cell ratio of 1:1. After 4 days, cells were stained for CD45.1, CD4, CD8 and 7-AAD and proliferation of living CD45.1<sup>+</sup>CD4<sup>+</sup> and CD45.1<sup>+</sup>CD8<sup>+</sup> T cells was analyzed by CFSE dilution.
